# Supplementary material
Source: MDPI journal article supplement (https://www.mdpi.com/1999-4907/13/7/1090)
Supplement: s1 [file s1]

# Supplementary figures and tables:

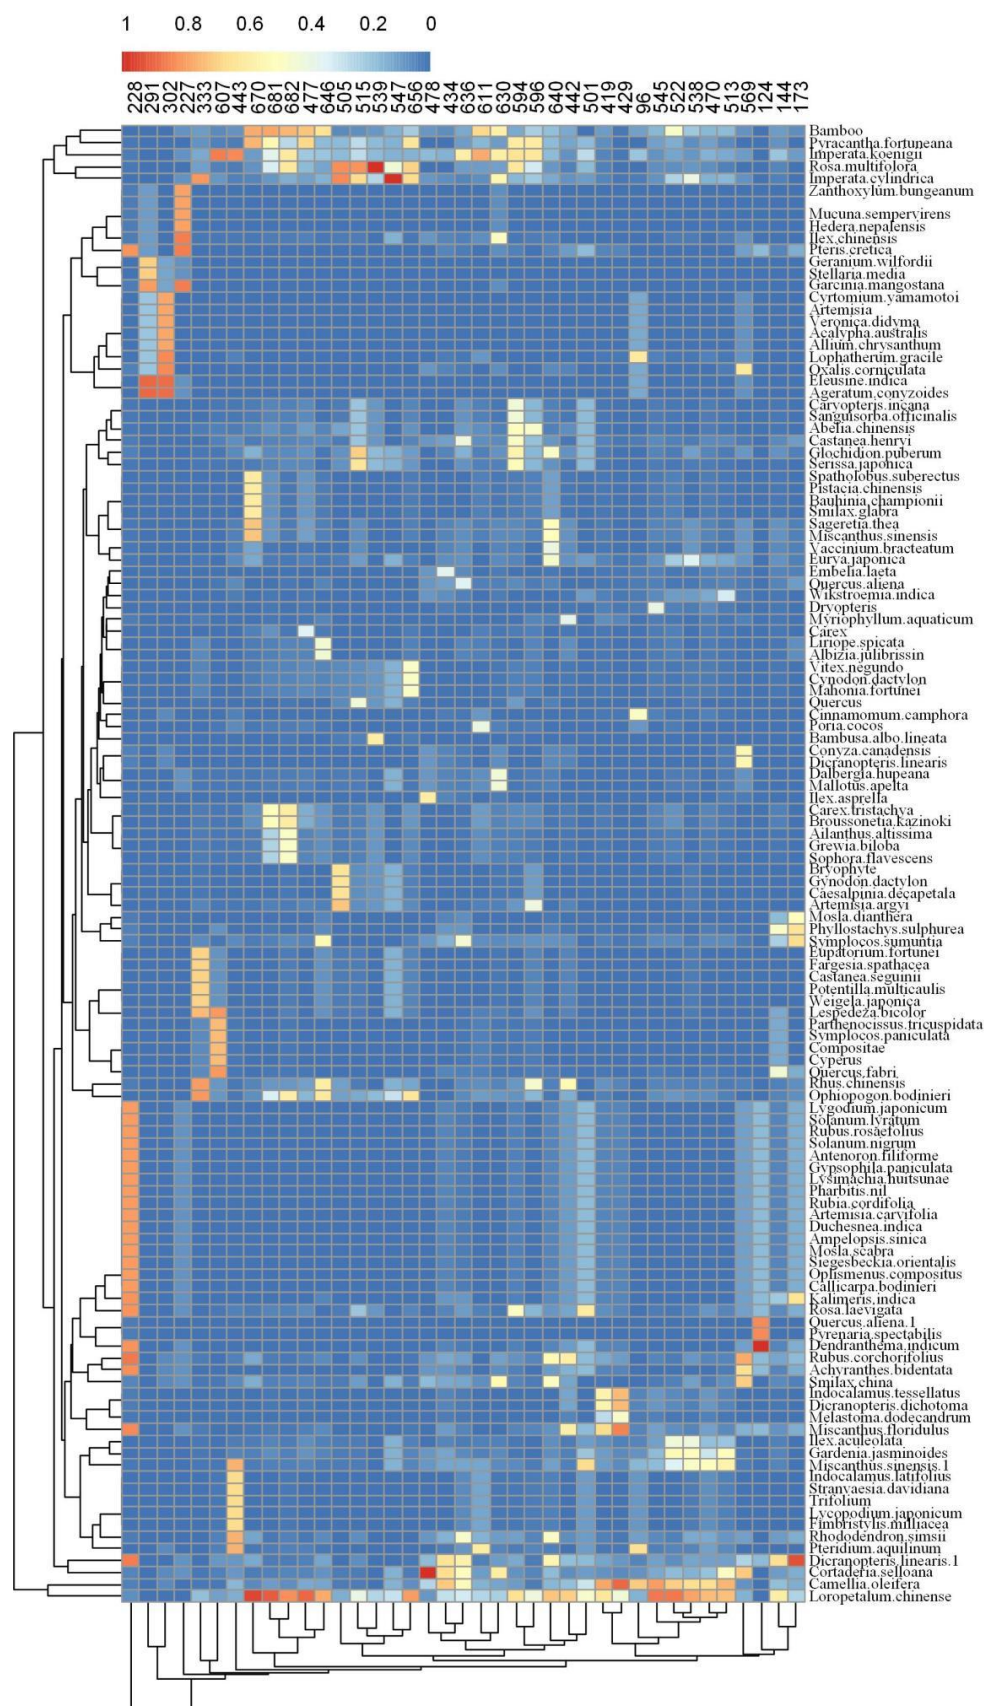

Supplementary Figure S1: Heatmap of distribution probability of species in plot.

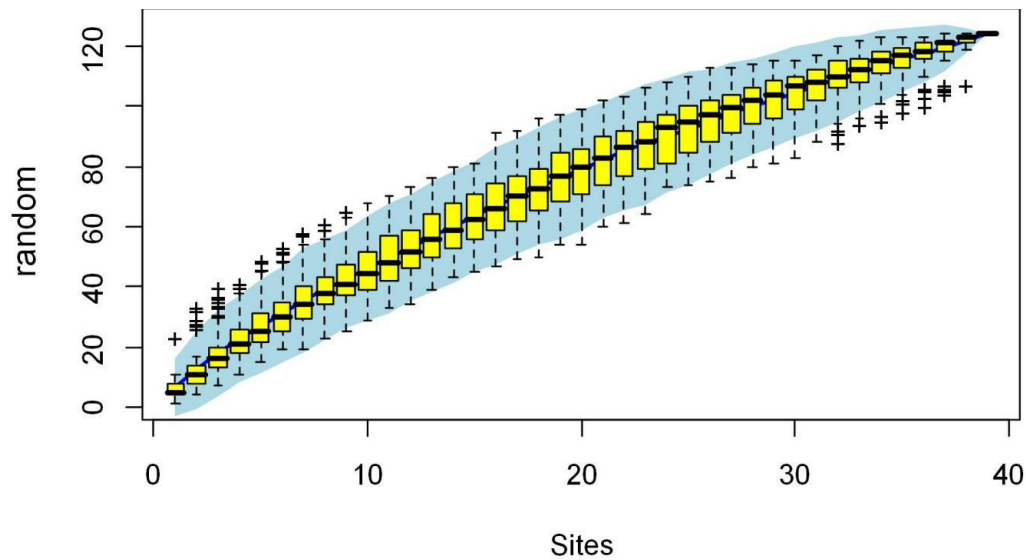

**Supplementary Figure S2:** Species accumulation curves.

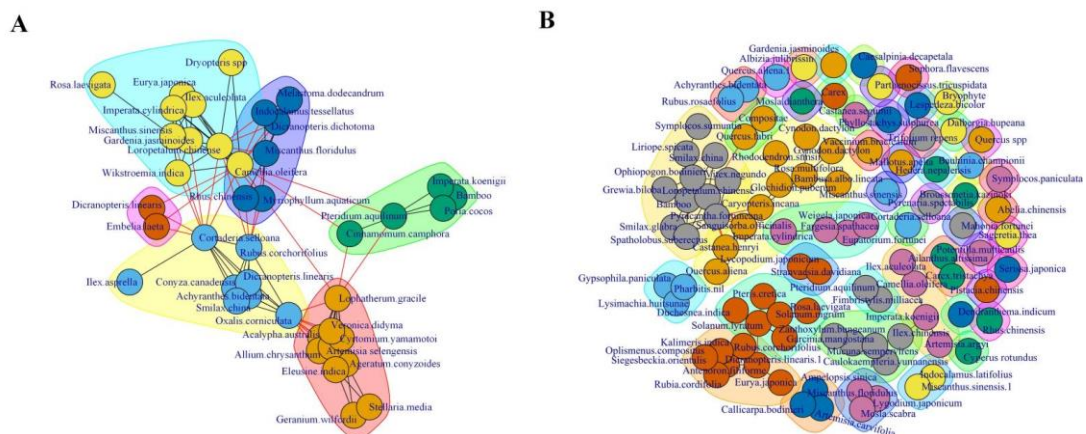

**Supplementary Figure S3:** Co-occurring network of artificial disturbance community (A) and Natural community (B).

**Supplementary Table S1:** Predicted species richness of each plots.

| Plots ID | 96   | 124  | 14<br>4 | 17<br>3 | 227 | 228 | 29<br>1 | 302 | 333 | 419 | 429 | 434 | 442 | 443 |
|----------|------|------|---------|---------|-----|-----|---------|-----|-----|-----|-----|-----|-----|-----|
| Observed |      |      |         |         |     |     |         |     |     |     |     |     |     |     |
| species  | 4    | 3    | 4       | 5       | 7   | 24  | 5       | 9   | 9   | 5   | 5   | 4   | 5   | 9   |
| richness |      |      |         |         |     |     |         |     |     |     |     |     |     |     |
| Chao     |      |      |         |         |     |     |         |     |     |     |     |     |     |     |
| model    | 4    | 3    | 4       | 5       | 10  | 26  | 5       | 9   | 9.5 | 5   | 5   | 4   | 6   | 9   |
| Variance |      |      |         |         |     |     |         |     |     |     |     |     |     |     |
| of chao  | 0    | 0    | 0       | 0       | 4.4 | 2.5 | 0       | 0.2 | 1.2 | 0.2 | 0   | 0.2 | 2.2 | 0.4 |
| ACE      |      |      |         |         |     |     |         |     |     |     |     |     |     |     |
| model    | 4    | 3    | 4       | 5       | 11. | 27. | 5       | 9.6 | 10. | 5.6 | 5   | 4.6 | 6.8 | 9.4 |
| Variance |      |      |         |         |     |     |         |     |     |     |     |     |     |     |
| of ACE   | 0.87 | 1.83 | 0       | 0.      | 1.5 | 2.4 | 1.      | 1.2 | 1.4 | 1.0 | 0.8 | 1.0 | 1.1 | 1.5 |
|          |      | E-08 | 89      | 1       | 1   | 2   | 10      | 7   | 7   | 4   | 9   | 3   | 7   | 1   |
| Plots ID | 470  | 477  | 47<br>8 | 50<br>1 | 505 | 513 | 51<br>5 | 522 | 538 | 539 | 545 | 547 | 569 | 594 |

|                 |            |            |           |           |            |            |           |            |            |            |            |   |     |     |
|-----------------|------------|------------|-----------|-----------|------------|------------|-----------|------------|------------|------------|------------|---|-----|-----|
| Observed        |            |            |           |           |            |            |           |            |            |            |            |   |     |     |
| species         | 3          | 4          | 2         | 2         | 6          | 6          | 5         | 5          | 7          | 2          | 3          | 1 | 7   | 11  |
| richness        |            |            |           |           |            |            |           |            |            |            |            |   |     |     |
| Chao            |            |            |           |           |            |            |           |            |            |            |            |   |     |     |
| model           | 4          | 4          | 2         | 2         | 6          | 7.5        | 5         | 5          | 7          | 2          | 3          | 1 | 7   | 11  |
| Variance        |            |            |           |           |            |            |           |            |            |            |            |   |     |     |
| of chao         | 2.12       | 0          | 0         | 0.        | 0          | 2.5        | 0         | 0          | 0.1        | 0          | 0          | 0 | 0.2 | 0   |
|                 |            |            |           | 35        |            | 4          |           |            | 5          |            |            |   | 3   |     |
| ACE             |            |            |           |           |            |            |           |            |            |            |            |   |     |     |
| model           | 6.9        | 4          | 2         | 3.        | 6          | 8.8        | 5         | 5          | 7.8        | /          | 3          | / | 7.7 | 11  |
|                 |            |            |           | 09        |            | 5          |           |            | 0          |            |            |   | 0   |     |
| Variance        |            |            |           |           |            |            |           |            |            |            |            |   |     |     |
| of ACE          | 1.14       | 0.87       | 0         | 0.        | 1.1        | 1.4        | 1.        | 0.8        | 1.3        | /          | 0.8        | / | 1.4 | 1.4 |
|                 |            |            |           | 90        | 5          | 2          | 10        | 9          | 3          |            | 2          |   | 6   | 8   |
| <b>Plots ID</b> | <b>596</b> | <b>607</b> | <b>61</b> | <b>63</b> | <b>636</b> | <b>640</b> | <b>64</b> | <b>656</b> | <b>670</b> | <b>681</b> | <b>682</b> |   |     |     |
|                 |            |            | <b>1</b>  | <b>0</b>  |            |            | <b>6</b>  |            |            |            |            |   |     |     |
| Observed        |            |            |           |           |            |            |           |            |            |            |            |   |     |     |
| species         | 5          | 7          | 4         | 8         | 8          | 10         | 7         | 8          | 9          | 5          | 10         |   |     |     |
| richness        |            |            |           |           |            |            |           |            |            |            |            |   |     |     |
| Chao            |            |            |           |           |            |            |           |            |            |            |            |   |     |     |
| model           | 5          | 8          | 4         | 8         | 8          | 20         | 10        | 8.5        | 12.        | 5          | 15         |   |     |     |
|                 |            |            |           |           |            |            |           |            | 33         |            |            |   |     |     |
| Variance        |            |            |           |           |            |            |           |            |            |            |            |   |     |     |
| of chao         | 0.11       | 1.79       | 0.        | 0         | 0.1        | 10.        | 4.        | 1.2        | 4.0        | 0.4        | 5.9        |   |     |     |
|                 |            |            | 22        |           | 2          | 17         | 44        | 7          | 9          | 5          | 7          |   |     |     |
| ACE             |            |            |           |           |            |            |           |            |            |            |            |   |     |     |
| model           | 5.67       | 12.3       | 5         | 8         | 8.5        | 21.        | 14        | 8.8        | 18.        | 5.5        | 19.        |   |     |     |
|                 |            | 5          |           |           |            | 92         | .6        | 9          | 83         | 5          | 59         |   |     |     |
| Variance        |            |            |           |           |            |            |           |            |            |            |            |   |     |     |
| of ACE          | 1.20       | 2.04       | 0.        | 1.        | 1.4        | 2.2        | 1.        | 1.1        | 2.3        | 1.0        | 2.6        |   |     |     |
|                 |            |            | 93        | 22        | 1          | 3          | 27        | 1          | 5          | 6          | 8          |   |     |     |
